# Supplementary material for: Identification of Four Key Prognostic Genes and Three Potential Drugs in Human Papillomavirus Negative Head and Neck Squamous Cell Carcinoma
Source: Research Square preprint supplement (doi:10.21203/rs.3.rs-113482/v1), 2020-11-25

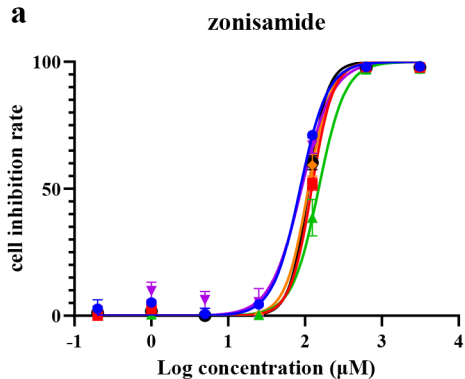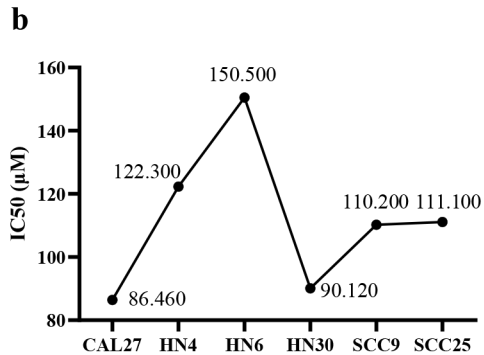

Supplement: Supplementary file [file b3b8c8fbf8eaf0f152560a37.pdf]
